# Supplementary material
Source: publisher site journal article supplement (https://www.dovepress.com/get_supplementary_file.php?f=442439.docx)
Supplement: Supplementary file 1 [file get_supplementary_file.php]

Preferred Reporting Items for Systematic Reviews and Meta-Analyses Extension for Scoping Reviews (PRISMA-ScR) Checklist

| Section | Item | PRISMA-ScR Checklist Item | Reported On Page |
| --- | --- | --- | --- |
| Title | | | |
| Title | 1 | Identify the report as a scoping review. | 1 |
| Abstract | | | |
| Structured summary | 2 | Provide a structured summary that includes (as applicable): background, objectives, eligibility criteria, sources of evidence, charting methods, results, and conclusions that relate to the review questions and objectives. | 1-2 |
| Introduction | | | |
| Rationale | 3 | Describe the rationale for the review in the context of what is already known. Explain why the review questions/objectives lend themselves to a scoping review approach. | 4 |
| Objectives | 4 | Provide an explicit statement of the questions and objectives being addressed with reference to their key elements (eg, population or participants, concepts, and context) or other relevant key elements used to conceptualize the review questions and/or objectives. | 4 |
| Methods | | | |
| Protocol and registration | 5 | Indicate whether a review protocol exists; state if and where it can be accessed (eg, a Web address); and if available, provide registration information, including the registration number. | 5 |
| Eligibility criteria | 6 | Specify characteristics of the sources of evidence used as eligibility criteria (eg, years considered, language, and publication status), and provide a rationale. | 5-6 |
| Information sources | 7 | Describe all information sources in the search (eg, databases with dates of coverage and contact with authors to identify additional sources), as well as the date the most recent search was executed. | 5 |
| Search | 8 | Present the full electronic search strategy for at least 1 database, including any limits used, such that it could be repeated. | 5, Table 1 |
| Selection of sources of evidence | 9 | State the process for selecting sources of evidence (ie, screening and eligibility) included in the scoping review. | 5-6 |
| Data charting process | 10 | Describe the methods of charting data from the included sources of evidence (eg, calibrated forms or forms that have been tested by the team before their use, and whether data charting was done independently or in duplicate) and any processes for obtaining and confirming data from investigators. | 6 |
| Data items | 11 | List and define all variables for which data were sought and any assumptions and simplifications made. | 6 |
| Critical appraisal of individual sources of evidence | 12 | If done, provide a rationale for conducting a critical appraisal of included sources of evidence; describe the methods used and how this information was used in any data synthesis (if appropriate). | NONE |
| Synthesis of results | 13 | Describe the methods of handling and summarizing the data that were charted. | 8, Supplementary Material 2 |
| Results | | | |
| Selection of sources of evidence | 14 | Give numbers of sources of evidence screened, assessed for eligibility, and included in the review, with reasons for exclusions at each stage, ideally using a flow diagram. | 6, Figure 1 |
| Characteristics of sources of evidence | 15 | For each source of evidence, present characteristics for which data were charted and provide the citations. | 6, 7, 8 |
| Critical appraisal within sources of evidence | 16 | If done, present data on critical appraisal of included sources of evidence (see item 12). | NONE |
| Results of individual sources of evidence | 17 | For each included source of evidence, present the relevant data that were charted that relate to the review questions and objectives. | 6, 7, Table 2,3 |
| Synthesis of results | 18 | Summarize and/or present the charting results as they relate to the review questions and objectives. | 6 |
| Discussion | | | |
| Summary of evidence | 19 | Summarize the main results (including an overview of concepts, themes, and types of evidence available), link to the review questions and objectives, and consider the relevance to key groups. | 8-13 |
| Limitations | 20 | Discuss the limitations of the scoping review process. | 13 |
| Conclusions | 21 | Provide a general interpretation of the results with respect to the review questions and objectives, as well as potential implications and/or next steps. | 13 |
| Funding | | | |
| Funding | 22 | Describe sources of funding for the included sources of evidence, as well as sources of funding for the scoping review. Describe the role of the funders of the scoping review. | 14 |

Abbreviations: PRISMA-ScR, Preferred Reporting Items for Systematic reviews and Meta-Analyses extension for Scoping Reviews.

Basic Characteristics of Oral Health Assessment Tool

| No. | Author, Year | Items |
| --- | --- | --- |
| 1 | Kayser-Jones et al. (1995)23 | Ten items: lips; tongue; tissue inside cheek, floor, and roof of mouth; gums between teeth and/or under artificial teeth; saliva; condition of natural teeth; condition of artificial teeth; pairs of teeth in chewing position [natural or artificial], and oral cleanliness |
| 2 | Henriksen et al. (1999)24 | Criteria for mucosal score (MS): (1) Normal appearance of the gingiva; (2) Mild inflammation and oral mucosa; (3) Moderate inflammation; (4) Severe inflammation.  Crlteria for Plaque Score (PS) on teeth and dentures: (1) No easily visible plaque; (2) Small amounts of hardly visible; (3) Moderate amounts of plaque; (4) Abundant amounts of confluent |
| 3 | Andersson et al. (2002)25 | Eight items: Voice; Lips; Mucous membranes Dentures remove; Tongue; Gums; Teethldentures; Saliva; Swallow |
| 4 | Chalmers et al. (2005)26 | Eight items: Lips; Tongue; Gums and tissues; Saliva; Natural teeth; Dentures; Oral cleanliness; Dental pain |
| 5 | Chia-Hui Chen et al. (2007)27 | Do you have regular dental checkups? |
| 6 | Ribeiro et al. (2014)28 | Eight items: Voice; Lips; Saliva (mirror); Swallow; Mucous membranes; Tongue; Gums; Teeth/dentures |
| 7 | Simpelaere et al. (2016)29 | Eight items: Lips; Tongue; Gums and tissues; Saliva; Natural teeth; Dentures; Oral cleanliness; Dental pain; Questionnaire to evaluate the feasibility of the OHAT |
| 8 | Zhao et al. (2016)30 | Ten items: Lymph nodes; lips; tongue; buccal floor and maxillary mucosa; perigingival or denture-covered gingiva; salivary secretion and effect on tissues; condition of natural teeth; condition of denture; occlusal status of teeth in masticatory position; oral hygiene status. |
| 9 | Yanagisawa et al. (2017)31 | Nine items: cleanness of teeth and gingiva; tongue coat; bad breath; pairs of teeth; denyure problems; difficulty chewing; mouth opening; tongue thrusting; dry mouth |
| 10 | Tsukada et al. (2017)32 | Twelve items: Lips; Tongue; Gums and tissues; Saliva; Natural teeth condition; Denture condition; Oral cleanliness; Tongue protrusion beyond the lower lip; Cheek puffing test; Articulation; Oral intake; Coughing during meals |
| 11 | Fjeld et al. (2017)33 | 0= No teeth with plaque；1 = Visible plaque on one or more, but less than half of the teeth have plaque；2 = Visible plaque on more than half/ all teeth (upper jaw/lower jaw) |

Basic Characteristics of Oral Health Assessment Tool (Continue)

| No. | Author, Year | Items |
| --- | --- | --- |
| 12 | Wang et al. (2019)34 | Eight items: Lips; Tongue; Gums and tissues; Saliva; Natural teeth; Dentures; Oral cleanliness; Dental pain |
| 13 | Krausch-Hofmann et al. (2019)35 | Six items: (the interRAI version for Long‐Term Care Facilities) removable dental prosthesis use; non-intact teeth; dry mouth; chewing problems; gum inflammation and pain.Four items: (the interRAI version for Home Care) removable dental prosthesis use; non-intact teeth; dry mouth; chewing problems. |
| 14 | Klotz et al. (2020)36 | Eight items: Lips; Tongue; Gums and tissues; Saliva; Natural teeth; Dentures; Oral cleanliness; Dental pain |
| 15 | Finotto et al. (2020)37 | Eight items: Lips; Tongue; Gums and tissues; Saliva, Natural teeth yes/no; Artificial teeth yes/no; Oral cleanliness; Dental pain |
| 16 | Krausch-Hofmann et al. (2021)38 | Nine items: Chewing problems; Pain/discomfort; Dry mouth; Denture hygiene; Oral hygiene; Teeth; Gums; Tongue; Palate/lips/cheeks |
| 17 | Cerveira et al. (2022)39 | Eight items: Lips; Tongue; Gums and tissues; Saliva; Natural teeth; Dentures; Oral cleanliness; Dental pain |
| 18 | Genç et al. (2023)40 | Ten items: First factor: Lymph nodes, Lips, Tongue, Tissue inside cheek, floor and roof of mouth, Saliva (effect on tissue), Condition of artificial teeth, Oral cleanliness. Second factor: Gums between teeth and/or under artificial teeth, Condition of natural teeth, Pairs of teeth in chewing position (natural or artificial) |
| 19 | van Noort et al. (2023)41 | Eight items: Lips; Tongue; Gums and Tissues; Saliva; Natural Teeth; Dentures; Oral cleanliness; Dental pain |

Basic Characteristics of Oral Health Assessment Tool

| No. | Author, Year | Dimension | Participants | Sample Size | Evaluator | Setting |
| --- | --- | --- | --- | --- | --- | --- |
| 1 | Kayser-Jones et al. (1995)23 | / | Nursing home residents (50-106y) | 100 | Registered nurses, licensed vocational nurses, and certified nursing assistants | Nursing home |
| 2 | Henriksen et al. (1999)24 | / | Elderly (73-99y) | 52 | Dentist | An institution for elderly Individuals with mental disabilities |
| 3 | Andersson et al. (2002)25 | / | Stroke patients in geriatric rehabilitation (61-96y) | 133 | Registered nurse | Hospital |
| 4 | Chalmers et al. (2005)26 | / | Older (Mean age 82.1y) | 455 | Carers for residents in residential care facilities | Aged care facilities |
| 5 | Chia-Hui Chen et al. (2007)27 | / | Community-dwelling elders (61-98y) | 240 | Gerontological nurse | Community |
| 6 | Ribeiro et al. (2014)28 | / | Community elderly (60-94y) | 60 | Community health workers | Community |
| 7 | Simpelaere et al. (2016)29 | / | Nursing homes, assisted living facilities, the acute geriatric department. (>62y） | 132 | Speech pathologists | Care settings |
| 8 | Zhao et al. (2016)30 | / | Older patients (≥60y) | 360 | Nurses | Hospital |

Basic Characteristics of Oral Health Assessment Tool (Continue)

| No. | Author, Year | Dimension | Participants | Sample Size | Evaluator | Setting |
| --- | --- | --- | --- | --- | --- | --- |
| 9 | Yanagisawa et al. (2017)31 | oral hygiene; biting and chewing; oral function. | Institutionalized older adults | 188 | Care worker | Nursing home |
| 10 | Tsukada et al. (2017)32 | / | Long-term care facility residents (mean age 85.9y) | 66 | Nurse and caregivers | Long-term care facility |
| 11 | Fjeld et al. (2017)33 | / | Nursing home residents | 41 | Nurses in nursing facilities | Nursing home |
| 12 | Wang et al. (2019)34 | / | Older persons in the community(>60y) | 200 | Nurse | Community |
| 13 | Krausch-Hofmann et al. (2019)35 | / | / | 102 | Multidisciplinary or caregiver | / |
| 14 | Klotz et al. (2020)36 | / | Nursing home residents (82.4y) | 18 | Caregivers and dentists | Nursing home |
| 15 | Finotto et al. (2020)37 | / | Elderly (>65y) | 368 | Nurse | Nursing home, care facility |
| 16 | Krausch-Hofmann et al. (2021)38 | / | long-term care facilities residents (mean age 86.3y) | 260 | Caregivers | Long-term care facilities |
| 17 | Cerveira et al. (2022)39 | / | Elderly people with neuro logic severe conditions (mean age 72y) | 30 | Care worker | Nursing homes |
| 18 | Genç et al. (2023)40 | / | Elderly (>65y) | 262 | Clinician nurse and academician nurse | Nursing home, Community-dwelling |
| 19 | van Noort et al. (2023)41 | / | Community-dwelling people (≥65y） | 51 | Community nurses | Community |

Basic Characteristics of Oral Health Assessment Tool

| No. | Author, Year | Reliability | | | Validity |
| --- | --- | --- | --- | --- | --- |
| Inter-rater reliability | Test-retest reliability | Intra-rater reliability |
| 1 | Kayser-Jones et al. (1995)23 | Correlation Coefficients (r=0.4-0.68). registered nurses: Percent Agreement (51.5%-98%), Kappa (0.1-0.82); licensed vocational nurses: Percent Agreement (50.5%-97%), Kappa (0.01-0.81); certified nursing assistants: Percent Agreement (54.6%-92.9%), Kappa (0.02-0.81) | Test-Retest Coefficients (r=0.79-0.83) | / | Content validity: review of the literature and consultation |
| 2 | Henriksen et al. (1999)24 | T1: Kappa 0.65; Weighted kappa 0.70. T2: Kappa 0.67; Weighted kappa 0.77 | / | Kappa 0.52,  Weighted kappa 0.62 | / |
| 3 | Andersson et al. (2002)25 | Percentage agreement (58%-91%), Cohen’s Kappa coefficient (0.45-0.84) | / | / | / |
| 4 | Chalmers et al. (2005)26 | Percent agreement (72.6-96.8), Kappa (0.47-0.66) | / | Percent agreement (74.4-96.6%), Kappa (0.51-0.71) | Content validity: review of the literature and consultation; Concurrent validity: percent agreement (42.9-100), correlation coefficients (0.007-1) |
| 5 | Chia-Hui Chen et al. (2007)27 | / | / | / | Convergent validity, Discriminant validity |

Basic Characteristics of Oral Health Assessment Tool (Continue)

| No. | Author, Year | Reliability | | | Validity |
| --- | --- | --- | --- | --- | --- |
| Inter-rater reliability | Test-retest reliability | Intra-rater reliability |
| 6 | Ribeiro et al. (2014)28 | kappa (0.38-1) | / | / | Sensitivity (0-1), Specificity (0.69-0.98), Accuracy (0.64-0.92) |
| 7 | Simpelaere et al. (2016)29 | Fleiss Kappa (0.83-1), Percent agreement (0.91-1), ICC: 0.96 | ICC: 0.81, Percent agreement (0.72-0.96), Cohen’s Kappa (0.14-0.91) | ICC: 0.95, Percent agreement (0.85-1) | / |
| 8 | Zhao et al. (2016)30 | Cronbach's alpha (0.737) | Cronbach's alpha (0.775) | / | Construct validities: EFA (cumulative contribution of 66.261%) |
| 9 | Yanagisawa et al. (2017)31 | Cronbach’s alpha 0.77, Cohen's Kappa (0.56-0.90), ICC (0.74-0.98) | / | ICC (0.86-0.97), Fleiss’ kappa coefficients (0.49-0.83) | The content and construct validities: the focus group |
| 10 | Tsukada et al. (2017)32 | Spearman correlation coefficients: dentist vs nurses (0.81), dentist vs caregivers (0.845) and nurses vs caregivers (0.837). Kappa values were statistically significant for categories E-L  (dentist-nurse ≥0.32; dentist-caregiver ≥0.33; nurse-caregiver ≥0.29) | / | / | Nurse: Sensitivity (0.86), Specificity (0.38), Accuracy (0.75), k=0.26. Caregivers: Sensitivity (0.91), Specificity (0.54), Accuracy (0.82), k=0.47. |

Basic Characteristics of Oral Health Assessment Tool (Continue)

| No. | Author, Year | Reliability | | | Validity |
| --- | --- | --- | --- | --- | --- |
| Inter-rater reliability | Test-retest reliability | Intra-rater reliability |
| 11 | Fjeld et al. (2017)33 | k=0.8 | / | The dental hygienist (к=0.7), the clinical nurse (к=0.8) | calibration validity: Spearman’s correlation coefficient (₨=0.78, p<0.001) |
| 12 | Wang et al. (2019)34 | Cronbach's α 0.71 | Cronbach's α 0.811 | / | Content validity: entry analysis: critical ratio method (CR 4.8-15.95); CVI 0.8-1, SCVI 0.875; structural validity: EFA |
| 13 | Krausch-Hofmann et al. (2019)35 | / | / | / | Content validity: Relevance (CVI: 0.67-1), Clarity of wording (CVI: 0.25-0.75), Feasibility (CVI: 0.41-0.83) |
| 14 | Klotz et al. (2020)36 | Reliability after training: ICC 0.774, kappa (0.47-0.941), Percentage agreement (75%-93.1%) | ICC: 0.91, Percentage  agreement (72.2-100), kappa (0.444-1) | / | / |
| 15 | Finotto et al. (2020)37 | Cronbach’s α=0.816 | The correlation coefficient expressed through Pearson’s r was 0.5 | / | Face validity: a clarity score of 80% or more and; content validity: I-CVI≥0.8, S-CVI=0.93; construct validity: CFA, EFA |
| 16 | Krausch-Hofmann et al. (2021)38 | Percentage agreement (69.8%-87.8%), Kappa (0.27-0.63) | / | Percentage agreement (80%-96.4%), Kappa (0.45-0.93) | / |

Basic Characteristics of Oral Health Assessment Tool (Continue)

| No. | Author, Year | Reliability | | | Validity |
| --- | --- | --- | --- | --- | --- |
| Inter-rater reliability | Test-retest reliability | Intra-rater reliability |
| 17 | Cerveira et al. (2022)39 | Percentage agreement (93.3%-100%), Cohen’s Kappa (0.88-1), ICC:0.99 | / | Percentage agreement (53.3%-100%), Cohen’s Kappa (0.23-1), ICC: 0.84 | Content validity: CVI (0.88-1) |
| 18 | Genç et al. (2023)40 | Cronbach’s α (overall scale=0.865, each item = 0.564-0.866), Kendall’s W value=0.979 | The correlation coefficient=0.95 | / | Content validity: CVI=0.9, criterion-related validity and concurrent validity (r=0.719)；construct validity: EFA, CFA (GFI=0.81, CFI=0.94, NFI=0.92) |
| 19 | van Noort et al. (2023)41 | Percent agreement (40.5%-97.3%), Weighted  Kappa (0.37-0.89), ICC: 0.79 | / | / | / |
